# Supplementary material
Source: Springer Nature journal article supplement (https://www.springermedizin.de/resource/supplementary/13054_2010_8683_MOESM3_ESM.pdf/9732778)

### 30-days all cause mortality

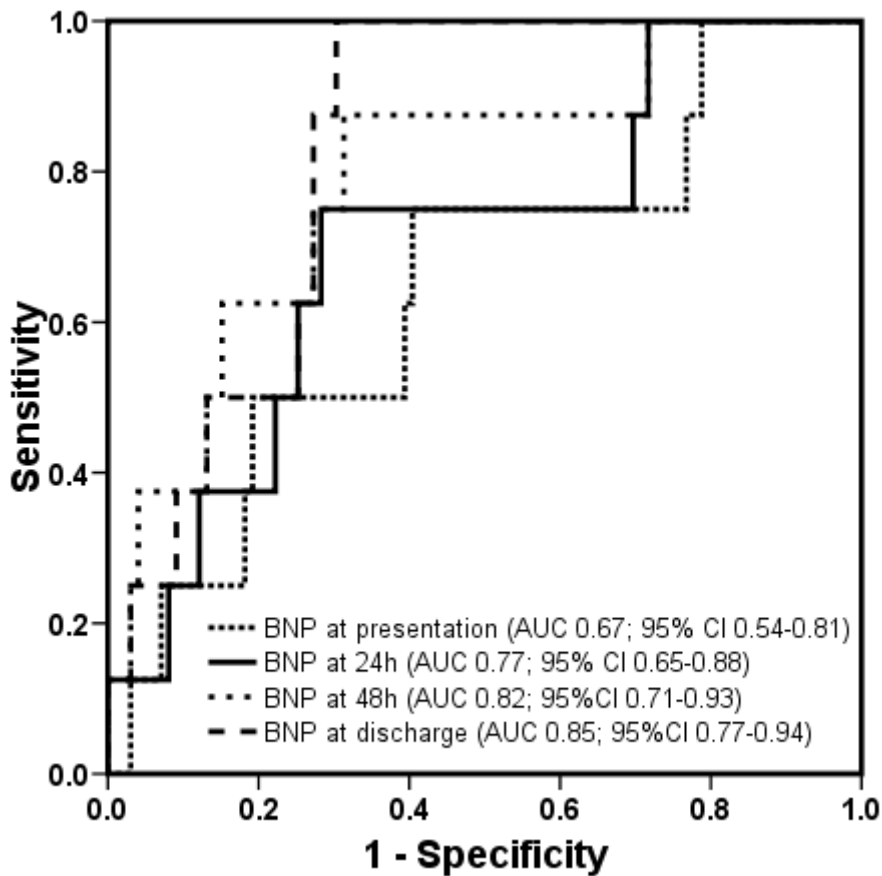

Supplement: MOESM3 [file 9732778]
